# Supplementary material for: Interfering TAL effectors of Xanthomonas oryzae neutralize R-gene-mediated plant disease resistance
Source: PubMed Central journal article supplement (PMC5097170; doi:10.1038/ncomms13435), 2016-11-04
Supplement: ncomms13435-s1.pdf [file ncomms13435-s1.pdf]

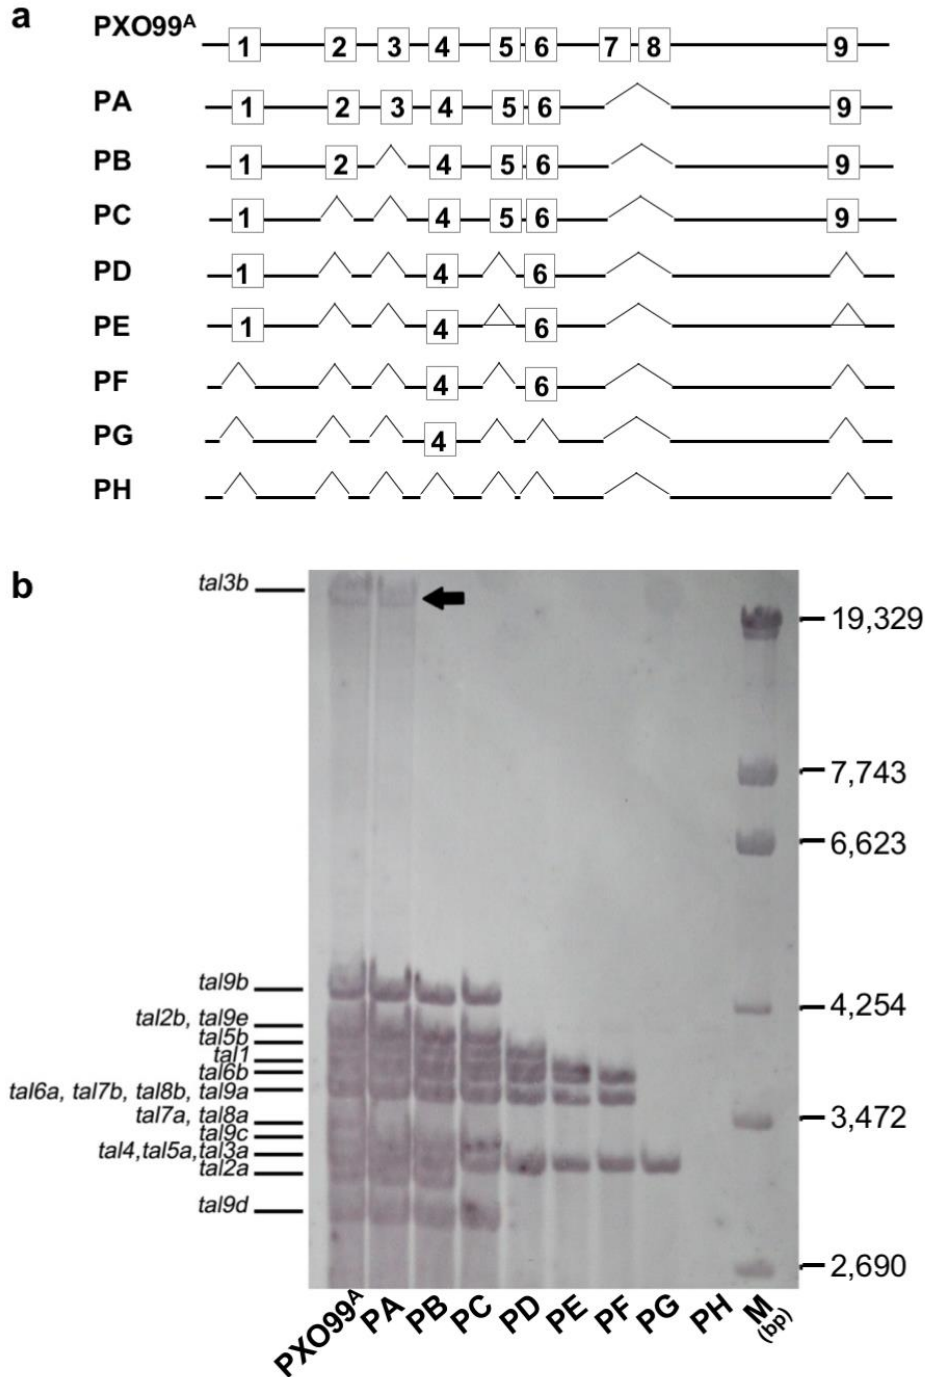

**Supplementary Figure 1: TALE gene cluster deletions in PXO99<sup>A</sup>.** (a) Schematic diagrams show nine TALE gene clusters in PXO99<sup>A</sup> and cluster deletions in mutants. Mutants (PA to PH) are sequential deletions of individual clusters as denoted by carets (^). (b) Southern blotting analysis of the TALE gene cluster mutants. After 8 rounds of sequential deletions, eight TALE mutants (PA to PH) including the TALE-free mutant PH were obtained. DNA ladder was denoted at the right side and TALE genes corresponding to the bands were marked at the left side.

**A**

|       |    |    |           |           |    |    |    |    |    |    |    |    |    |    |    |    |    |    |
|-------|----|----|-----------|-----------|----|----|----|----|----|----|----|----|----|----|----|----|----|----|
|       | 1  | 2  | 3         | 4         | 5  | 6  | 7  | 8  | 9  | 10 | 11 | 12 | 13 | 14 | 15 | 16 | 17 | 18 |
| Tal3a | NS | HD | <u>NG</u> | NG        | NG | HD | HD | NG | HD | NN | NG | HD | NN | DH | NG | HD | NI | N* |
| Tal3b | NS | HD | NG        | <u>NG</u> | NG | NG | NG | HD | HD | HD | NN | HD | NG | HD | HD | HD | HD | N* |

**B**

|               |  |                                      |   |   |   |  |   |   |   |         |   |  |  |  |  |  |  |  |  |  |  |
|---------------|--|--------------------------------------|---|---|---|--|---|---|---|---------|---|--|--|--|--|--|--|--|--|--|--|
|               |  | 3813 bp                              |   |   |   |  |   |   |   | 4122 bp |   |  |  |  |  |  |  |  |  |  |  |
|               |  | K                                    | R | S | R |  | S | D | R | A       | V |  |  |  |  |  |  |  |  |  |  |
| <i>pthXo1</i> |  | AAACGGTCCCGATCGGATCGTGCTGTC.....TGA  |   |   |   |  |   |   |   |         |   |  |  |  |  |  |  |  |  |  |  |
|               |  | *****                                |   |   |   |  |   |   |   |         |   |  |  |  |  |  |  |  |  |  |  |
| <i>Tal3a</i>  |  | AAACGGTCC <u>TG</u> ATCGGATCGTGCTGTC |   |   |   |  |   |   |   |         |   |  |  |  |  |  |  |  |  |  |  |
|               |  | K                                    | R | S | * |  |   |   |   |         |   |  |  |  |  |  |  |  |  |  |  |

**C**

|               |  |                                                             |   |   |   |   |  |     |   |   |   |   |   |   |   |   |   |   |     |  |  |
|---------------|--|-------------------------------------------------------------|---|---|---|---|--|-----|---|---|---|---|---|---|---|---|---|---|-----|--|--|
|               |  | 3360 bp                                                     |   |   |   |   |  |     |   |   |   |   |   |   |   |   |   |   |     |  |  |
|               |  | G                                                           | R | P | A | P |  | ... | A | F | N | E | E | E | L | A | W | L | ... |  |  |
| <i>pthXo1</i> |  | GGACGTCTGCCCCG... <u>CATTCAACGAAGAGGAGCTCGCATGGTTGA</u> ... |   |   |   |   |  |     |   |   |   |   |   |   |   |   |   |   |     |  |  |
|               |  | *****                                                       |   |   |   |   |  |     |   |   |   |   |   |   |   |   |   |   |     |  |  |
| <i>Tal3b</i>  |  | GGACGTCTGCCCCG / <u>CATTCAAGGAAGGAAATCGCATGAT</u> TGA       |   |   |   |   |  |     |   |   |   |   |   |   |   |   |   |   |     |  |  |
|               |  | G                                                           | R | P | A | P |  |     | H | S | R | K | R | K | S | H | D | * |     |  |  |

**D**

>PthXo1 C-terminus  
SIVAQLSRPDPALAAALTNDHLVALACLGGRPAMDAVKKGLPHAPELIRRNVNRRIGE  
RTSHRVADYAQVVRVLEFFQCHSHPAYAFDEAMTQFGMSRNLVQLFRRVGVTELE  
ARGGTLPPASQRWDRILQASGM**KRAK**PSPTSAQTPDQASLHAFADSLERDLDPASP  
MHEGDQTGASS**RKR**SRSDRAVTGPSAQHSFEVVRVPEQRDALHLPLSW**RVKRPR**TRI  
GGGLPDPGTPIAADLAASSTVMWEQDAAPFAGAADD**FPAFNEEELAWLMELLPQSG**  
**SVGGTI**

>Tal3a C-terminus  
SIVAQLSRPDPALAAALTNDHLVALACLGGRPALDAAVKKGLPHAPELIRRVNSRIGE  
RTSHRVADLAHVVRVLGFFQSHSHPAQAFDDAMTQFGMSRHGLVQLFRRVGVTEFE  
ARCGTIPPASQRWDRILQASGT**KRAK**PSPTSAQTPDQASLHAFDPDSLERDLDPASP  
MHEGDQTRAS**RKR**S

>Tal3b C-terminus  
SIVAQLSRRDPALAAALTNDOLVALACLGGRPAPHS**RKR**KSHD

**Supplementary Figure 2: Sequence information of Tal3a and Tal3b.** (a) The central repeats of predicted Tal3a and Tal3b in order of RVD (repeat variable di-amino acids). Underlined RVDs represent a repeat with a unique length of 28 amino acids compared to normal 34 amino acids. An asterisk (\*) denotes the last half repeat. (b) Partial sequences of *Tal3a* and the predicted truncated effector relative to *pthXo1*. (c) Partial sequences of *Tal3b* and the predicted truncated effector relative to *pthXo1*. (d) Predicted amino acid sequences of the C-termini of Tal3a and Tal3b compared to PthXo1. Underlined sequences are identical for the three TALEs; letters in red are predicted nuclear localization signals; bold letters are C-terminal transcription activation domain in PthXo1 but truncated in Tal3a and Tal3b.

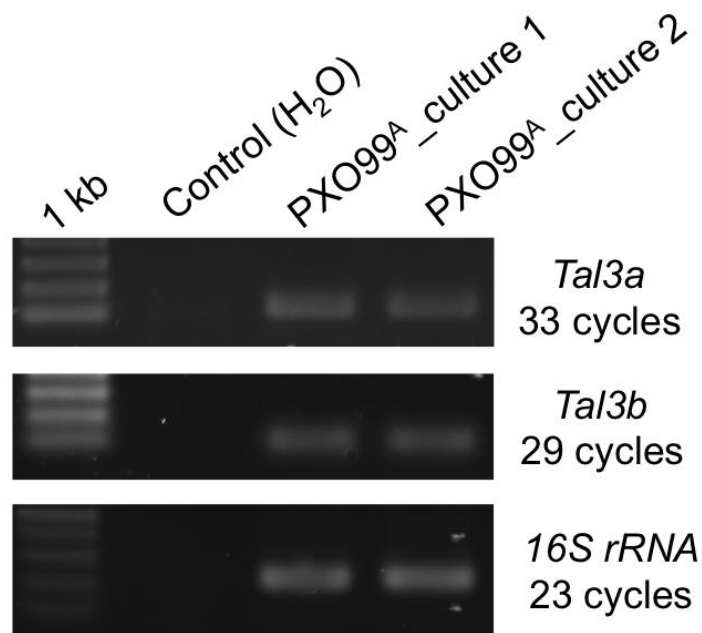

**Supplementary Figure 3: iTALE genes *Tal3a* and *Tal3b* were expressed in bacteria.** RNA from two PXO99<sup>A</sup> cultures (as indicated above each lane) was used for cDNA synthesis and PCR with gene specific primers. 16S rRNA gene expression was used as an internal control.

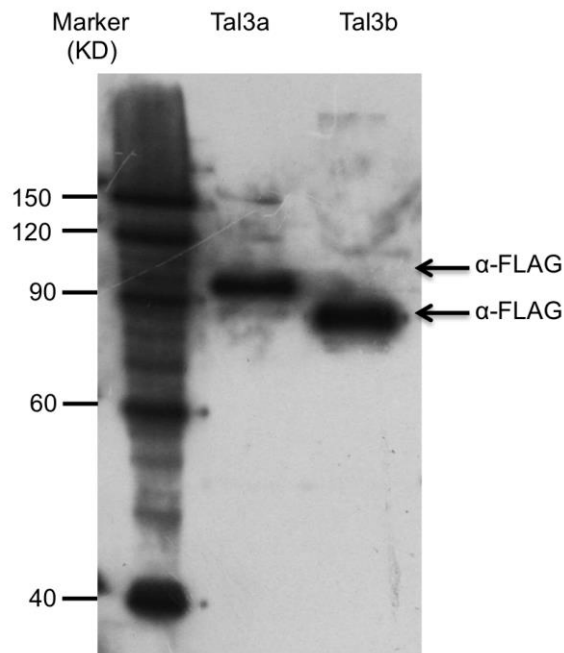

**Supplementary Figure 4: Western blotting analysis of Tal3a and Tal3b.** Bacterial extract was separated through gel electrophoresis and blotted/probed with the monoclonal antibody against the epitope FLAG.

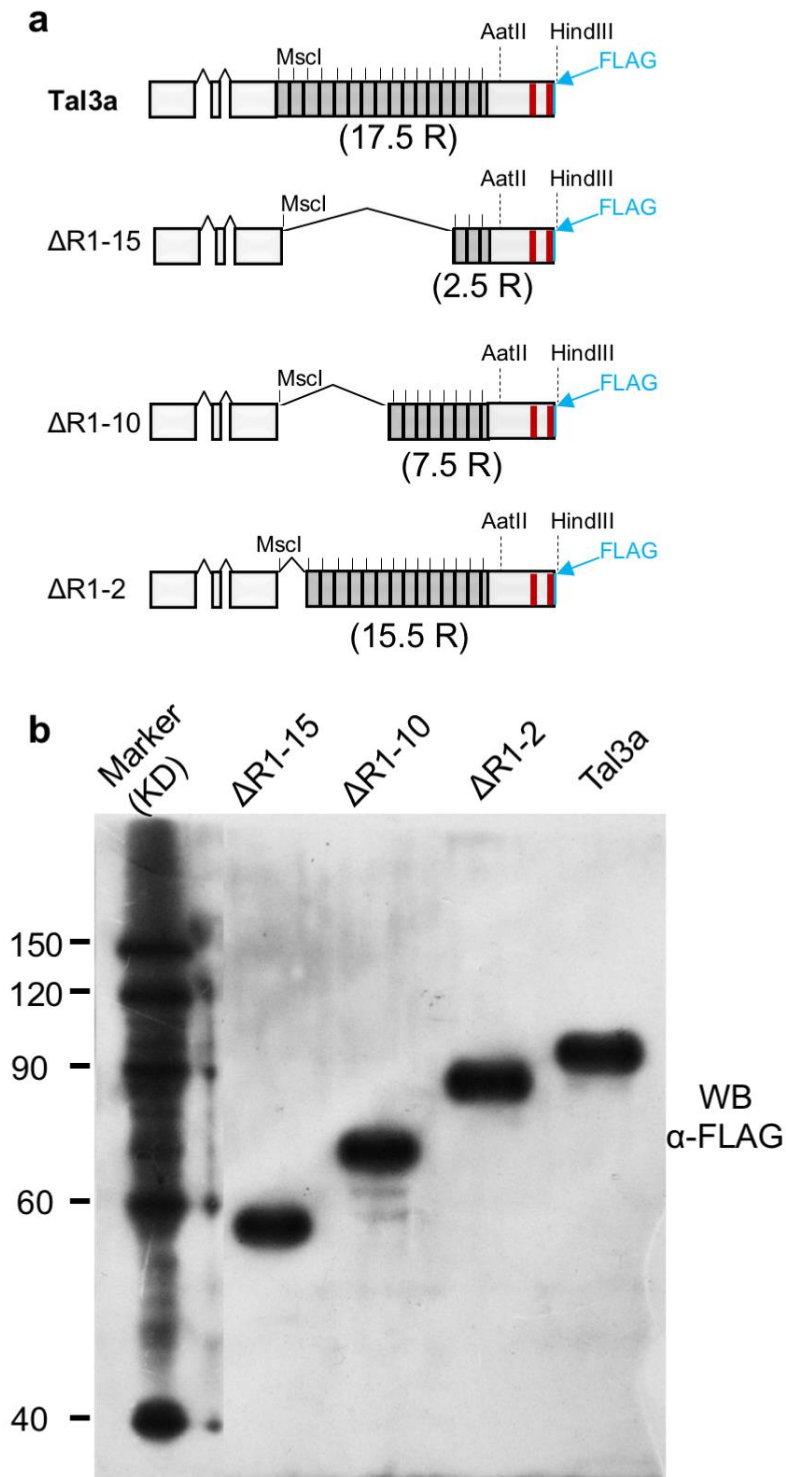

**Supplementary Figure 5: Western blotting analysis of Tal3a and its repeat deletion mutants.** (a) Schematic diagrams show structures of Tal3a and its derivatives. Genes with internal repeat deletions were obtained by partially deleting MscI fragments at the 5' ends. (b) Western blotting analysis. Bacterial extract was separated through gel electrophoresis and blotted/probed with monoclonal antibody against epitope FLAG.

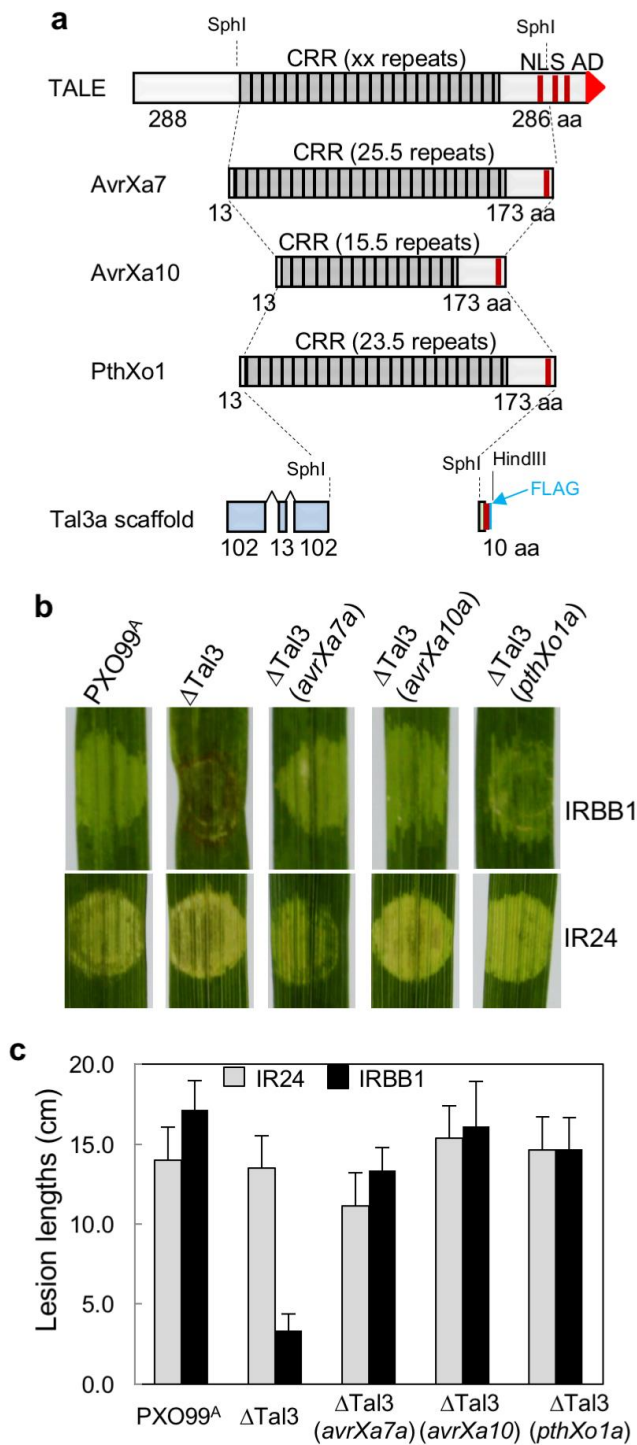

**Supplementary Figure 6: TAL effectors containing repeats of various TAL effector genes in the Tal3a scaffold function as resistance suppressors. (a)** Schematic diagrams showing how *avrXa7a*, *avrXa10* and *pthXo1* were constructed. SphI fragments in the full-length TALE genes were swapped into the corresponding region of the repeat-less *Tal3a*. **(b)** Disease reactions of IR24 and IRBB1 in response to various Xoo strains. Photos were taken 2 days post inoculation with clearing color indicating disease reaction and brown color denoting HR. **(c)** Lesion lengths caused by different strains in IR24 and IRBB1. Error bars (standard deviation, n=10, 3 replicates) with the same letter do not differ from each other at  $p < 0.05$  (Tukey test).

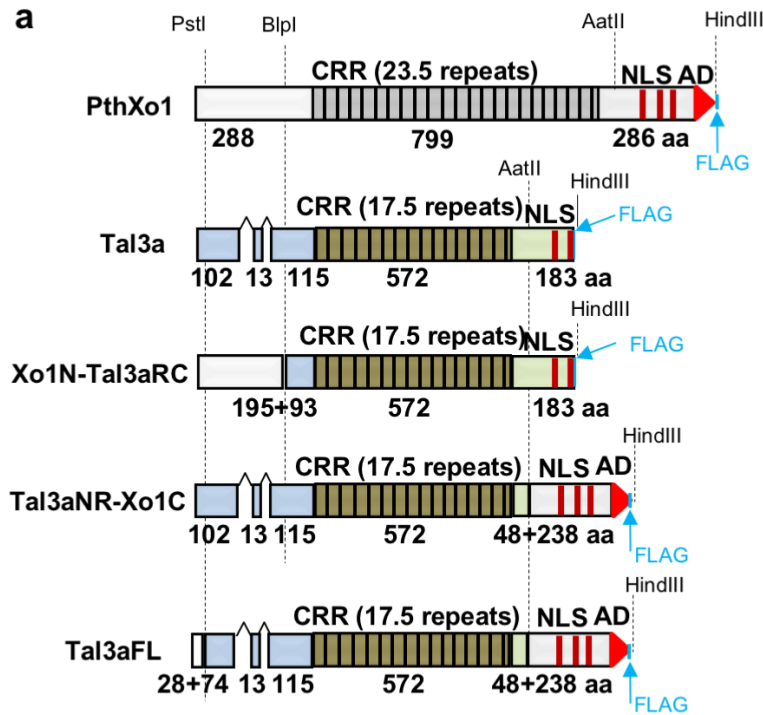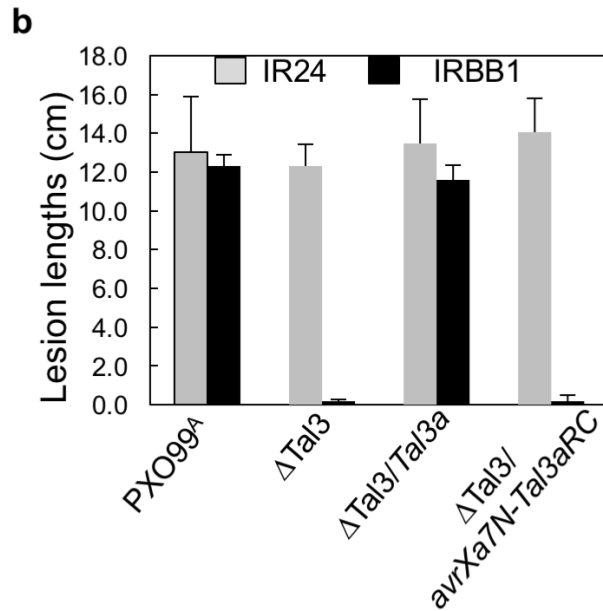

**Supplementary Figure 7: N-terminal domain of Tal3a is required for its ability to suppress resistance to  $\Delta$ Tal3 in IRBB1.** (a) Schematic diagrams show how hybrids of TALEs were made. Fragment defined by PstI and BlnI cleavage sites from *pthXo1* was swapped into *Tal3a*, resulting in Xo1N-Tal3aRC; AatII and HindIII fragment from *pthXo1* was swapped into *Tal3a* to produce Tal3aNR-Xo1C; and finally PstI-AatII fragment from *Tal3a* was swapped into *pthXo1*, resulting in Tal3aFL. (b) The Xoo strains were indicated below each column. *avrXa7N-Tal3aRC* is a chimeric gene of AvrXa7 N-terminus coding region and *Tal3a* central and C-terminal domain coding regions. Lesion lengths were measured at 14 DPI. Error bars (standard deviation, n=10, 3 replicates) with the same letter do not differ from each other at  $p < 0.05$  (Tukey test).

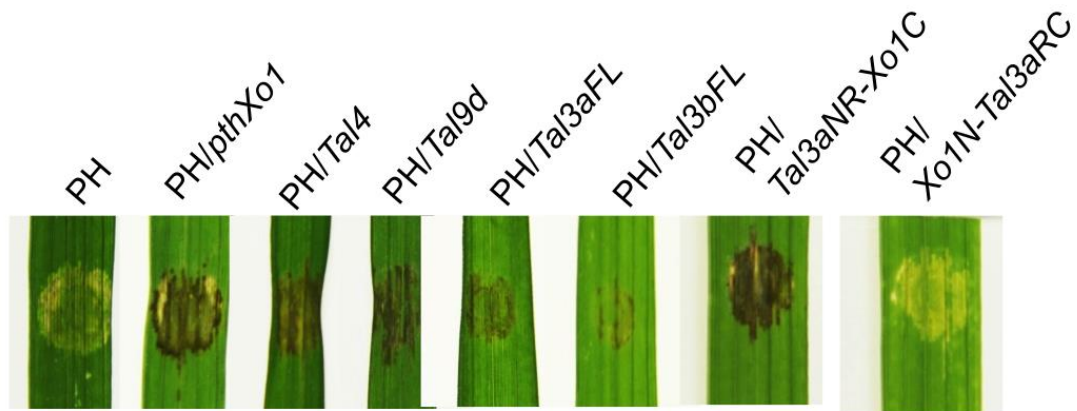

**Supplementary Figure 8: HR to various full-length TALEs in *Xa1*-transgenic plants.** Leaves of *Xa1* transgenic Kitaake were inoculated with PH strains containing individual TALE genes as indicated. PH is a PXO99<sup>A</sup> TALE-free mutant. *pthXo1*, *Tal4* and *Tal9d* are three plasmid-borne TALE genes from PXO99<sup>A</sup>. *Tal3aFL* and *Tal3bFL* are *avrXa7* variants swapped with *Tal3a* and *Tal3b* repetitive domains, resulting in the restructured full-length versions of *Tal3a* and *Tal3b*, respectively. *Tal3aNR-Xo1C* consists of *Tal3a* N-terminal and repetitive domains and PthXo1 C-terminus. *Xo1N-Tal3aRC* is a *Tal3a* variant containing PthXo1 N-terminus and *Tal3a* central repetitive and C-terminal domains. Photos were taken at 3 DPI.

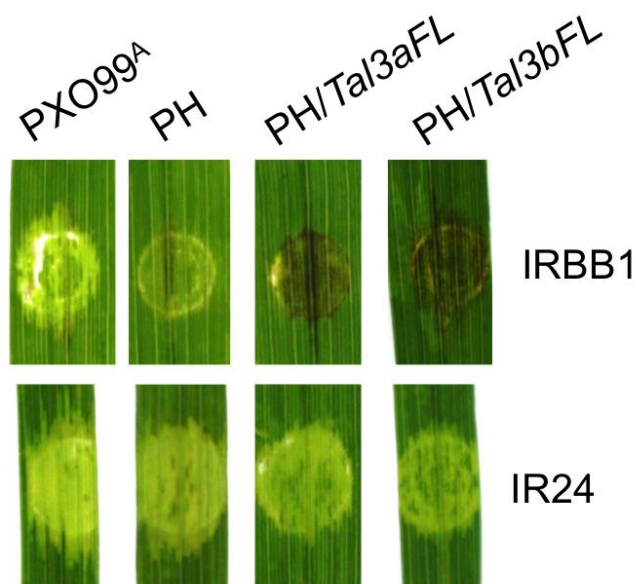

**Supplementary Figure 9: Full-length C-terminus of TALE enabled *Tal3a* and *Tal3b* to trigger HR specifically in IRBB1.** The Xoo strains were indicated above the leaves. PH is the TALE gene free mutant of PXO99<sup>A</sup>. Photos were taken at 3 DPI.

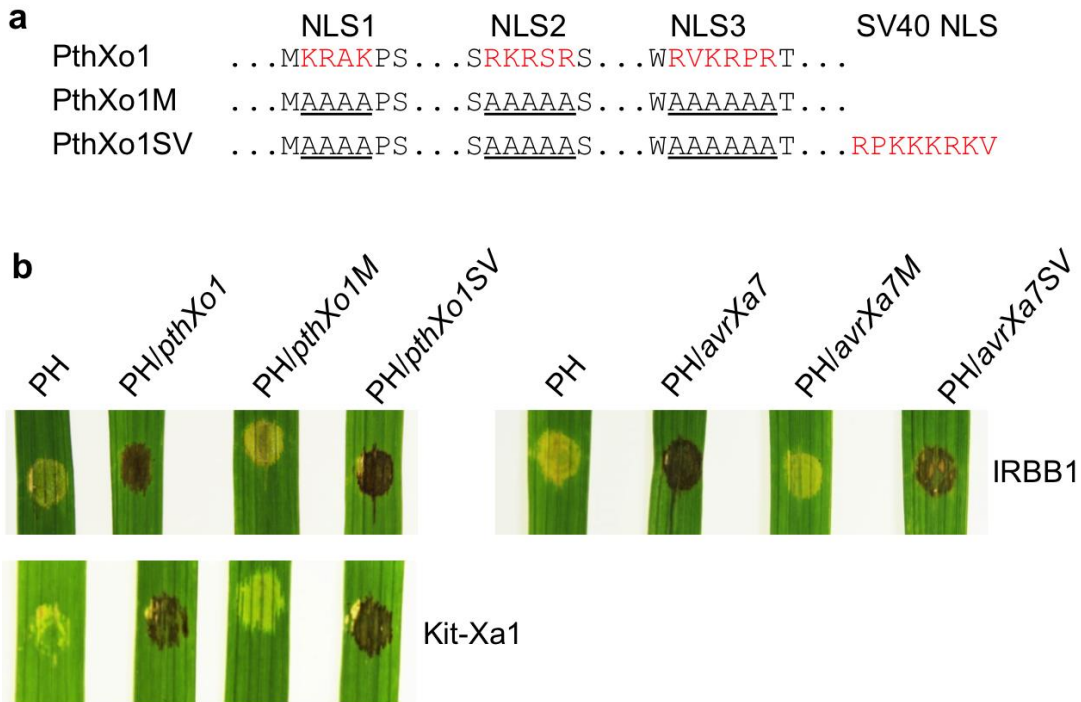

**Supplementary Figure 10: Nuclear localization motifs in PthXo1 and AvrXa7 are required for activation of *Xa1* resistance.** (a) Amino acids of the NLS and replacements in PthXo1 and its derivatives are in red and underlined. Sequences for AvrXa7 and its derivatives were as described in a prior study (ref. 1). (b) Disease reactions in *Xa1* containing plants to various Xoo strains as indicated above the leaves. Photos were taken 3 DPI.

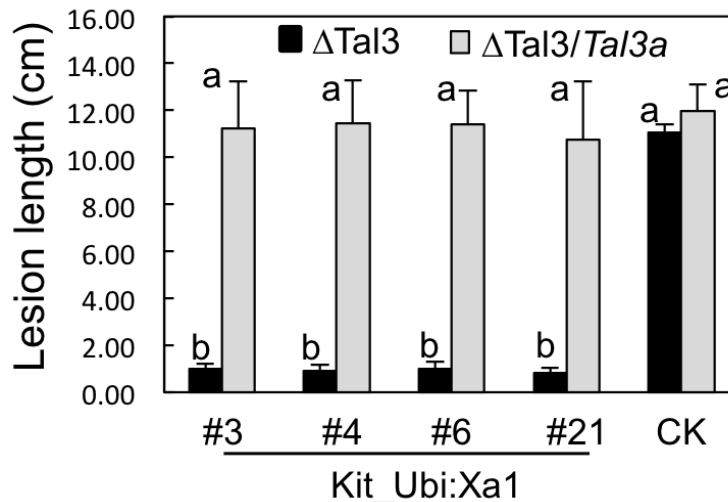

**Supplementary Figure 11: Overexpressed *Xa1* confers resistance to  $\Delta$ Tal3 and iTALE gene *Tal3a* suppresses the resistance.** Four lines of transgenic Kitaake expressing *Xa1* under the rice ubiquitin promoter were resistant to  $\Delta$ Tal3 strain but susceptible to the complementing strain  $\Delta$ Tal3 with *Tal3a*. The non-transgenic plants (CK) were susceptible to both  $\Delta$ Tal3 and  $\Delta$ Tal3/*Tal3a*. Lesion lengths were measured 12 DPI. Error bars (standard deviation, n=8, 2 replicates) with the same letter do not differ from each other at  $p < 0.05$  (Tukey test).



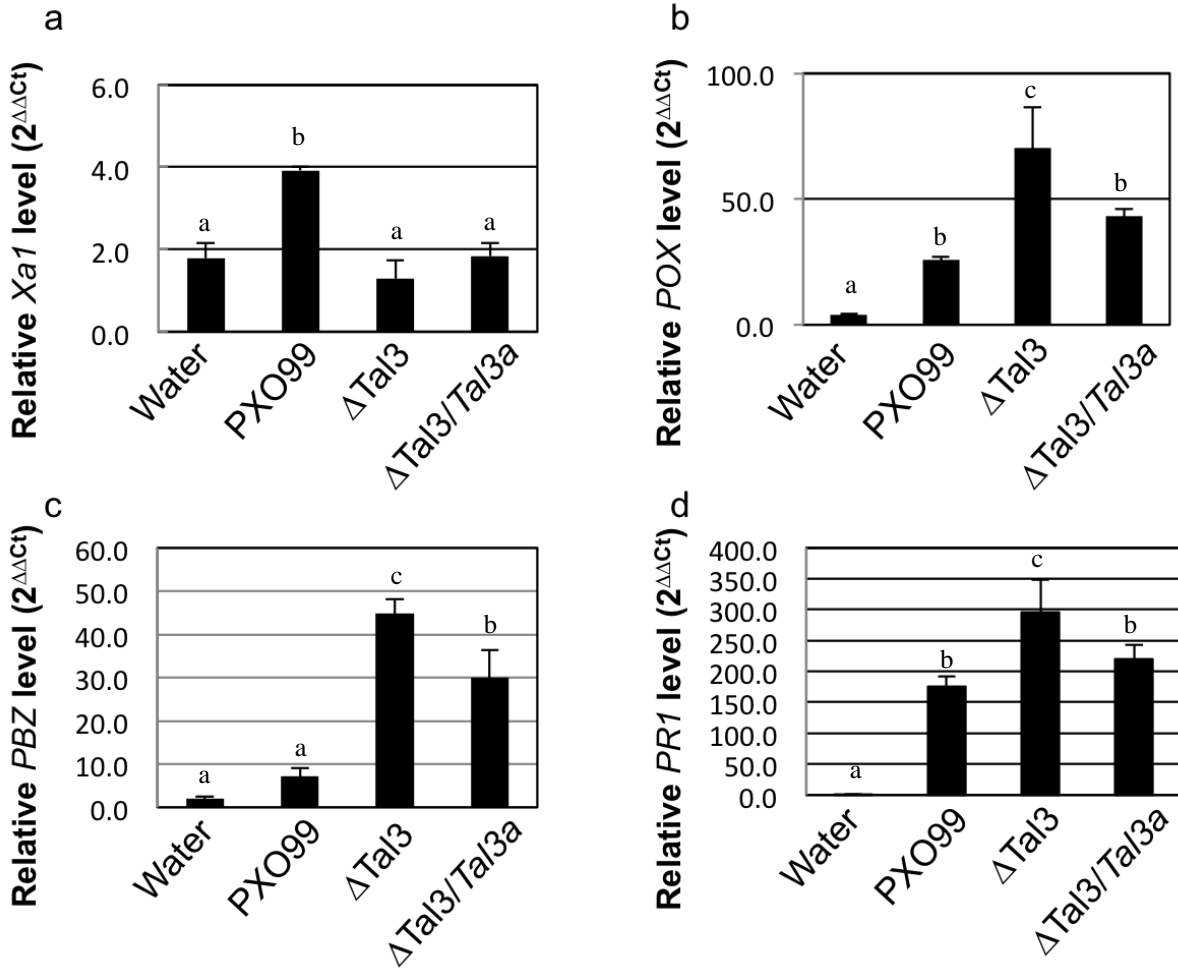

**Supplementary Figure 12: Rice defense genes in IRBB1 are induced by TALE and the gene induction is suppressed by Tal3a.** Three-weeks-old plants of IRBB1 were inoculated with water (wounding), PXO99<sup>A</sup>,  $\Delta Tal3$  and  $\Delta Tal3/Tal3a$ , and total RNA was isolated at 24 hr after inoculation. cDNA prepared from the samples was subjected to quantitative RT-PCR using primers specific to *Xa1* (a), peroxidase *PXO22.3* (Os07g48020) (b), *PBZ* (probenazole-inducible gene, Os12g36880) (c) and *PRI* (pathogenesis-related gene, Os07g03730) (d). Gene-specific primers for the rice actin gene (Os03g50885) were used for control. The expression level relative to that of non-inoculated leaves is presented in average threshold cycle (Ct) using the  $2^{-\Delta\Delta Ct}$  method (ref. 2). Error bars (standard deviation from 3 replicates) with the same letter do not differ from each other at  $p < 0.05$  (Tukey test).

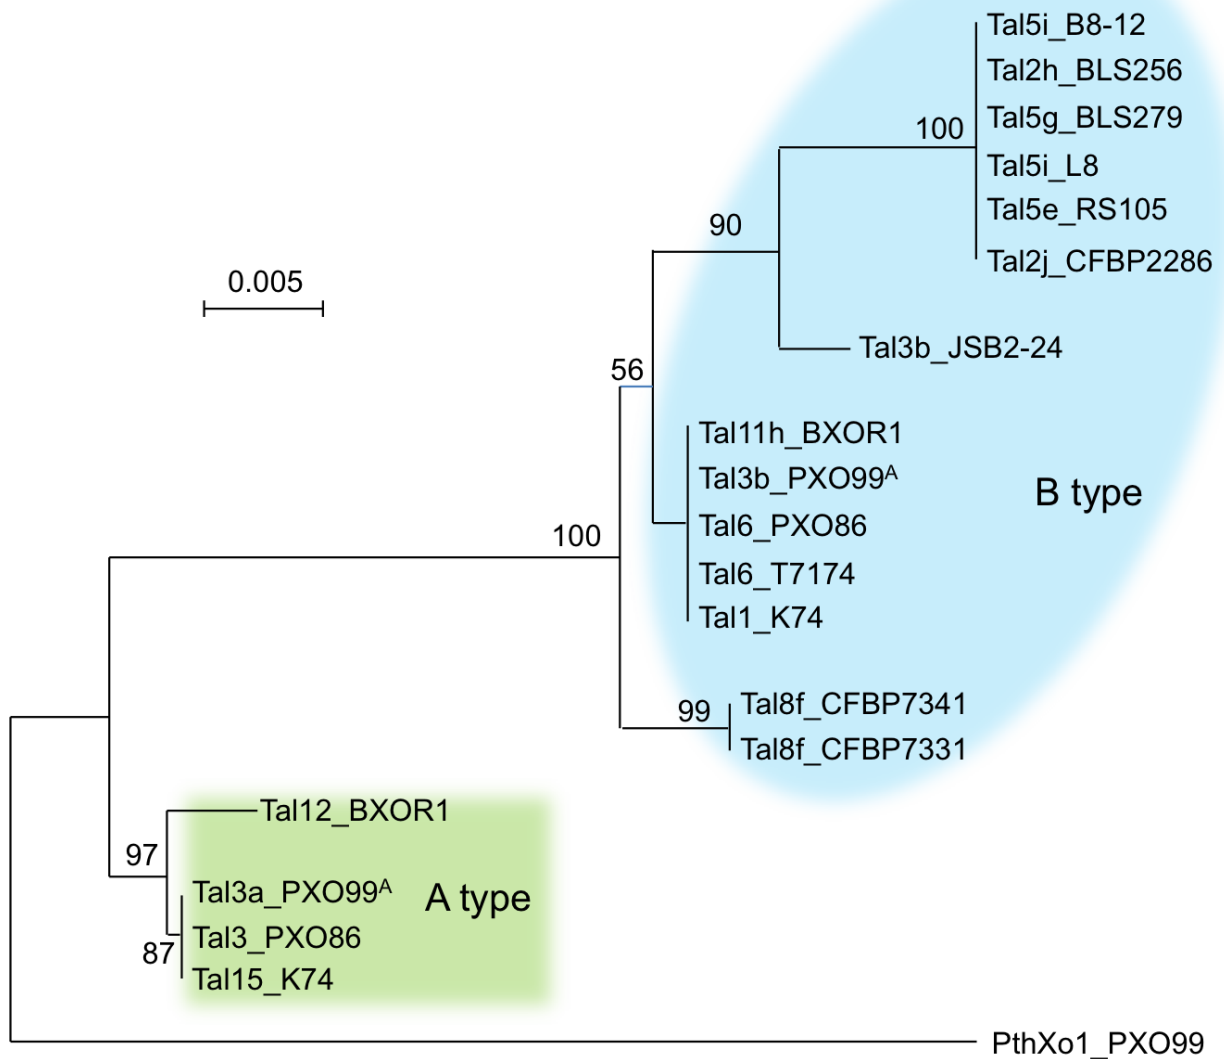

**Supplementary Figure 13: Unrooted phylogenetic tree of 18 iTALE genes from Xoo (n=4) and Xoc (n=14).** Bootstrap values shown at nodes were obtained from 1,000 trials, and branch lengths correspond to the divergence of DNA sequences, as indicated by the relative scale. Neighbor-Joining method (Software Mega 6, <http://www.megasoftware.net>) was used for the tree.

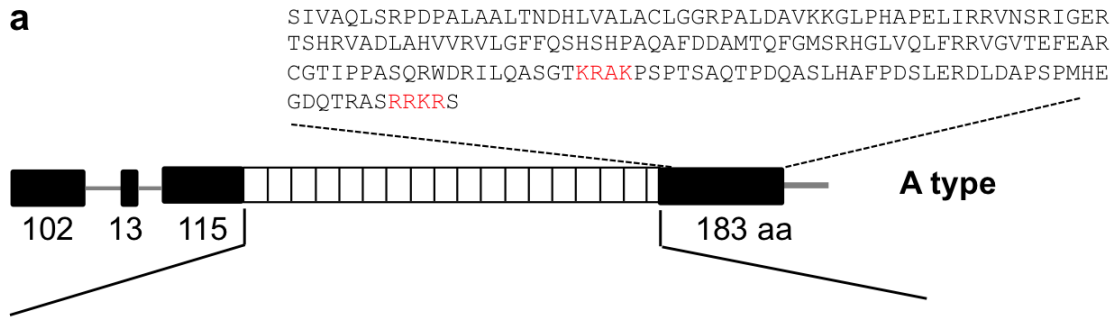

|                                   | 1  | 2  | 3         | 4         | 5  | 6  | 7  | 8  | 9  | 10 | 11 | 12 | 13 | 14 | 15 | 16 | 17 | 18 | 19 |
|-----------------------------------|----|----|-----------|-----------|----|----|----|----|----|----|----|----|----|----|----|----|----|----|----|
| <b><i>X. o. pv. oryzae</i></b>    |    |    |           |           |    |    |    |    |    |    |    |    |    |    |    |    |    |    |    |
| Tal3a_PX099 <sup>A</sup>          | NS | HD | <u>NG</u> | NG        | NG | HD | HD | NG | HD | NN | NG | HD | NN | DH | NG | HD | NI | N* |    |
| Tal3_PX086                        | NS | HD | NG        | <u>NG</u> | NG | NG | NG | HD | HD | HD | NN | HD | NG | HD | NI | HD | NN | N* |    |
| Tal15_K74                         | NS | HD | NG        | <u>NG</u> | NG | NG | HD | HD | HD | HD | NN | HD | NG | HD | NI | HD | NN | N* |    |
| <b><i>X. o. pv. oryzicola</i></b> |    |    |           |           |    |    |    |    |    |    |    |    |    |    |    |    |    |    |    |
| Tal12_BXOR1                       | NI | HG | HG        | <u>HG</u> | HG | HG | NG | HD | HD | HD | HD | HD | NG | NG | NI | NN | HD | HD | H* |

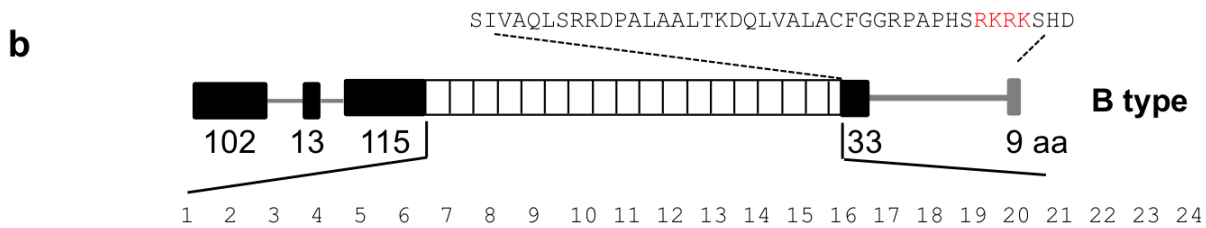

|                                   |    |    |    |           |           |           |           |    |    |    |    |    |    |    |    |    |    |    |    |    |    |    |    |    |
|-----------------------------------|----|----|----|-----------|-----------|-----------|-----------|----|----|----|----|----|----|----|----|----|----|----|----|----|----|----|----|----|
| <b><i>X. o. pv. oryzae</i></b>    |    |    |    |           |           |           |           |    |    |    |    |    |    |    |    |    |    |    |    |    |    |    |    |    |
| Tal3b_PX099 <sup>A</sup>          | NS | HD | NG | <u>NG</u> | NG        | NG        | NG        | HD | HD | HD | NN | HD | NG | HD | HD | HD | HD | N* |    |    |    |    |    |    |
| Tal6_PX086                        | NS | NG | NG | <u>NG</u> | NG        | NG        | NG        | HD | HD | HD | NN | HD | NG | HD | HD | HD | HD | H* |    |    |    |    |    |    |
| Tal6_T7174                        | NS | HD | NG | <u>NG</u> | NG        | NG        | HD        | HD | HD | HD | NN | HD | NG | HD | HD | HD | NN | H* |    |    |    |    |    |    |
| Tal1_K74                          | NS | HD | NG | <u>NG</u> | NG        | NG        | HD        | HD | HD | HD | NN | HD | HD | HD | HD | NN | H* |    |    |    |    |    |    |    |
| <b><i>X. o. pv. oryzicola</i></b> |    |    |    |           |           |           |           |    |    |    |    |    |    |    |    |    |    |    |    |    |    |    |    |    |
| Tal5i_B8-12                       | NI | ND | HG | HG        | HG        | HG        | <u>NG</u> | HG | HG | HD | HD | HD | HD | HD | NN | NN | HD | NG | HH | H* | H* | NN | HD | H* |
| Tal5e_RS105                       | NI | ND | HG | HG        | HG        | HG        | <u>NG</u> | HG | HG | HD | HD | HD | HD | NN | NN | HD | HG | HH | H* | H* | NN | HD | H* |    |
| Tal5i_L8                          | NI | HD | HG | HG        | HG        | <u>NG</u> | HG        | HG | HD | HD | HD | NN | NN | HD | HG | HH | H* | H* | NN | HD | H* |    |    |    |
| Tal2j_CFBP2286                    | NS | ND | HG | HG        | HG        | <u>NG</u> | HG        | HD | HD | HD | NN | NN | HD | HG | HH | H* | H* | NN | HD | H* |    |    |    |    |
| Tal3b_JSB2-24                     | NI | HG | HG | HG        | <u>HG</u> | HG        | NG        | HD | HD | HD | NN | NN | HD | HG | HH | HG | HG | NN | HD | H* |    |    |    |    |
| Tal5g_BLS279                      | NI | ND | HG | HG        | HG        | <u>NI</u> | HG        | HG | HD | HD | NN | NN | HD | HG | HH | N* | H* | NN | HD | H* |    |    |    |    |
| Tal2h_BLS256                      | NS | ND | HG | HG        | HG        | <u>NG</u> | HG        | HG | HD | HD | NN | NN | HD | HG | HH | H* | H* | NN | HD | H* |    |    |    |    |
| Tal11h_BXOR1                      | NI | HG | HG | <u>HG</u> | HG        | HG        | NG        | HD | HD | HD | HD | HD | NG | NG | NI | NN | HD | HD | H* |    |    |    |    |    |
| Tal8f_CFBP7331                    | NI | HD | HD | N*        | HD        | H*        |           |    |    |    |    |    |    |    |    |    |    |    |    |    |    |    |    |    |
| Tal8f_CFBP7341                    | NI | HD | HD | N*        | HD        | H*        |           |    |    |    |    |    |    |    |    |    |    |    |    |    |    |    |    |    |

**Supplementary Figure 14: Alignment of repeats of 18 iTALEs as represented by the 12<sup>th</sup> and 13<sup>th</sup> amino acids (RVD) of each repeat.** The single amino acid code is used for each amino residue. An asterisk (\*) denotes the missing 13<sup>th</sup> amino acid. Underlined RVD represents a repeat with a deletion of 6 amino acids (23<sup>th</sup> to 28<sup>th</sup>). (a) and (b) represent type A and type B effectors, respectively.

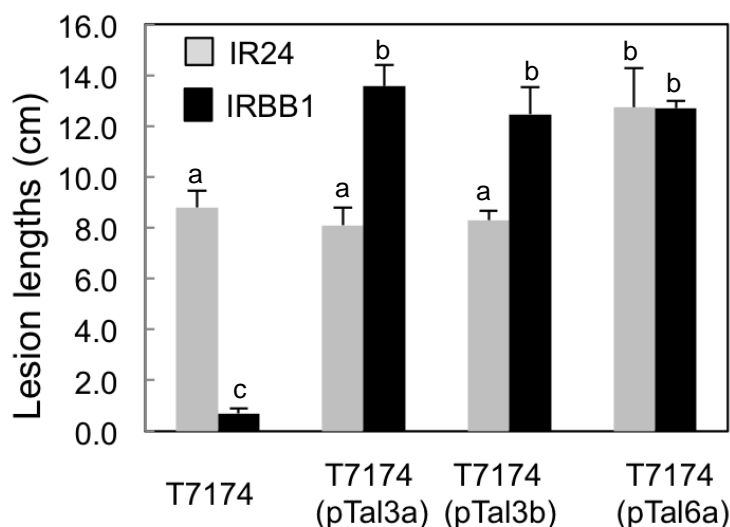

**Supplementary Figure 15: iTALEs enable IRBB1-incompatible strain T7174 compatible to IRBB1.** Xoo strains with the plasmid-borne *Tal3a* and *Tal3b* from PXO99<sup>A</sup> and *Tal6a* from T7174 in the scaffold of *Tal3a* were inoculated in IR24 (T7174 compatible) and IRBB1. Lesion lengths were measured 12 days post inoculation. Error bars (standard deviation, n=10, 3 replicates) with the same letter do not differ from each other at  $p < 0.05$  (Tukey test).

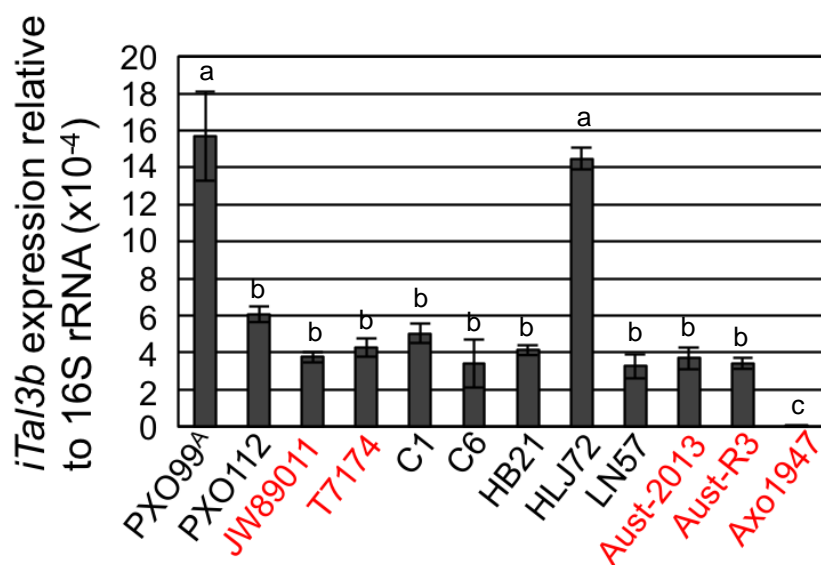

**Supplementary Figure 16: expression of type B iTALE genes in different Xoo strains grown in medium.** Quantitative RT-PCR was performed on bacterial total RNA with expression levels of type B genes relative to the 16S rRNA gene. Strains are indicated below individual bars and the IRBB1-incompatible strains are labeled in red. All strains except PXO99<sup>A</sup> and AXO1947 contain only type B iTALE gene. Error bars represent standard deviation of three replicates. Bars with the same letter different from each other at  $p < 0.05$  (Tukey test).

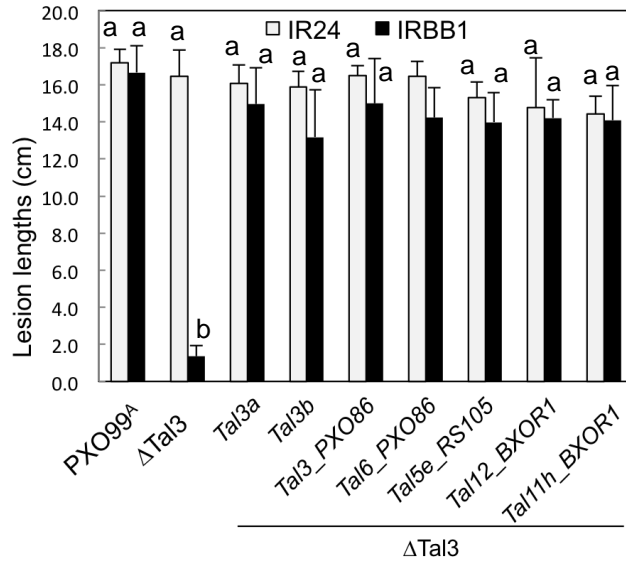

**Supplementary Figure 17: iTALEs from Xoo and Xoc suppress  $\Delta$ Tal3 triggered resistance in IRBB1.** Five-week old IR24 and IRBB1 plants were inoculated with strains as indicated below each column using leaf-tip clipping method. Lesion lengths were measured at 13 DPI. Error bars (standard deviation, n=6, 2 replicates) with the same letter do not differ from each other at  $p < 0.05$  (Tukey test).

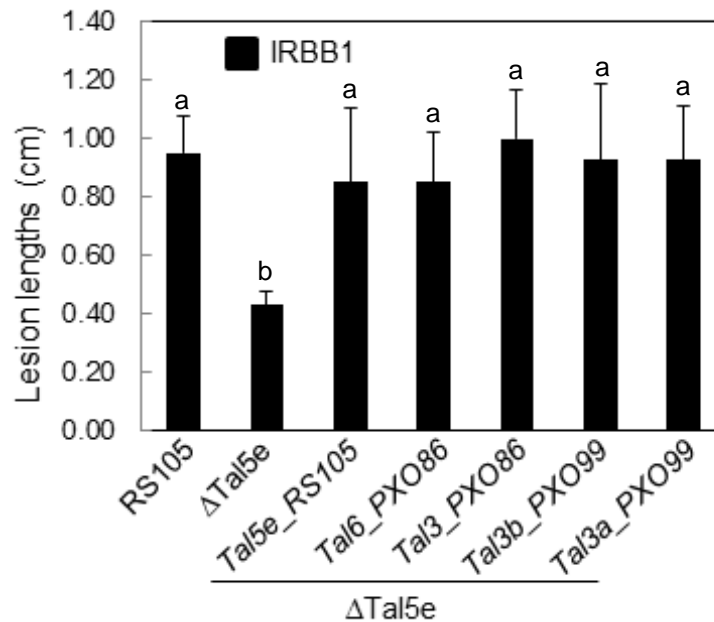

**Supplementary Figure 18: Suppressive activity of the Xoo iTALE genes in Xoc.** iTALE genes from PXO86 and PXO99<sup>A</sup> of Xoo restore the Xoc mutant ( $\Delta$ Tal5e) ability to cause disease in IRBB1 in term of lesion length measured at 7 DPI. Error bars (standard deviation, n=6, 2 replicates) with the same letter do not differ from each other at  $p < 0.05$  (Tukey test).

**Supplementary Table 1. Lesion lengths (cm) of different rice varieties caused by PXO99<sup>A</sup> and its TALE gene deletion mutants.**

| Rice Lines  | PXO99 and its TALE gene cluster Mutants |                        |                         |                       |                        |                        |                       |                       |                       |
|-------------|-----------------------------------------|------------------------|-------------------------|-----------------------|------------------------|------------------------|-----------------------|-----------------------|-----------------------|
|             | PXO99                                   | PA                     | PB                      | PC                    | PD                     | PE                     | PF                    | PG                    | PH                    |
| IRBB1       | 13.3±4.2 <sup>A</sup>                   | 12.1±3.2 <sup>A</sup>  | 3.3±1.1 <sup>B</sup>    | 0.7±0.6 <sup>B</sup>  | 0.4±0.2 <sup>B</sup>   | 0.7±0.5 <sup>B</sup>   | 1.2±0.8 <sup>B</sup>  | 0.7±0.4 <sup>B</sup>  | 1.2±0.6 <sup>B</sup>  |
| IRBB3       | 23.3±2.9 <sup>A</sup>                   | 26.7±5.4 <sup>A</sup>  | 25.4±4.5 <sup>A</sup>   | 1.9±1.2 <sup>B</sup>  | 1.4±1.8 <sup>B</sup>   | 1.1±1.2 <sup>B</sup>   | 1.1±1.2 <sup>B</sup>  | 0.8±0.5 <sup>B</sup>  | 1.2±1.0 <sup>B</sup>  |
| IRBB4       | 23.2±4.4 <sup>A</sup>                   | 23.1±3.2 <sup>A</sup>  | 22.3±9.0 <sup>A</sup>   | 2.8±1.4 <sup>B</sup>  | 2.2±1.1 <sup>B</sup>   | 2.5±2.0 <sup>B</sup>   | 1.2±0.9 <sup>B</sup>  | 1.0±0.5 <sup>B</sup>  | 0.7±0.4 <sup>B</sup>  |
| IRBB5       | 15.3±3.4 <sup>A</sup>                   | 15.9±0.8 <sup>A</sup>  | 16.5±2.7 <sup>A</sup>   | 1.1±0.6 <sup>B</sup>  | 0.3±0.3 <sup>B</sup>   | 0.5±0.3 <sup>B</sup>   | 0.3±0.2 <sup>B</sup>  | 0.6±0.4 <sup>B</sup>  | 0.8±0.6 <sup>B</sup>  |
| IRBB7       | 7.0±2.8 <sup>A</sup>                    | 7.04±2.6 <sup>A</sup>  | 5.5±1.8 <sup>A</sup>    | 0.4±0.4 <sup>B</sup>  | 0.3±0.2 <sup>B</sup>   | 0.3±0.2 <sup>B</sup>   | 0.6±0.4 <sup>B</sup>  | 0.4±0.3 <sup>B</sup>  | 0.3±0.1 <sup>B</sup>  |
| IRBB8       | 16.6±1.5 <sup>A</sup>                   | 15.5±0.8 <sup>A</sup>  | 13.2±2.2 <sup>B</sup>   | 1.3±0.4 <sup>C</sup>  | 1.6±0.6 <sup>C</sup>   | 1.5±0.7 <sup>C</sup>   | 1.3±0.2 <sup>C</sup>  | 2.2±0.7 <sup>C</sup>  | 2.4±0.2 <sup>C</sup>  |
| IRBB10      | 20.5±5.3 <sup>A</sup>                   | 18.4±5.2 <sup>A</sup>  | 17.6±1.9 <sup>A</sup>   | 1.3±0.4 <sup>B</sup>  | 0.5±0.4 <sup>B</sup>   | 0.97±0.5 <sup>B</sup>  | 0.4±0.2 <sup>B</sup>  | 0.2±0.1 <sup>B</sup>  | 0.5±0.2 <sup>B</sup>  |
| IRBB11      | 22.0±3.1 <sup>A</sup>                   | 21.3±3.4 <sup>A</sup>  | 20.6±4.5 <sup>A</sup>   | 2.3±0.9 <sup>B</sup>  | 1.5±0.2 <sup>B</sup>   | 1.8±0.3 <sup>B</sup>   | 1.9±0.4 <sup>B</sup>  | 2.0±0.2 <sup>B</sup>  | 1.6±0.3 <sup>B</sup>  |
| IRBB11(T)   | 8.2±2.5 <sup>A</sup>                    | 8.1±2.6 <sup>A</sup>   | 5.9±3.2 <sup>AB</sup>   | 4.4±3.4 <sup>BC</sup> | 2.0±1.0 <sup>C</sup>   | 1.1±0.4 <sup>C</sup>   | 1.0±0.5 <sup>C</sup>  | 1.4±0.3 <sup>C</sup>  | 1.8±0.8 <sup>C</sup>  |
| IRBB13      | 1.8±1.0 <sup>A</sup>                    | 2.0±1.0 <sup>A</sup>   | 1.0±0.5 <sup>AB</sup>   | 1.1±0.5 <sup>AB</sup> | 0.9±0.4 <sup>AB</sup>  | 0.4±0.2 <sup>B</sup>   | 0.3±0.1 <sup>B</sup>  | 0.4±0.4 <sup>B</sup>  | 0.6±0.5 <sup>B</sup>  |
| IRBB21      | 1.6±1.3 <sup>A</sup>                    | 0.4±0.3 <sup>B</sup>   | 0.4±0.2 <sup>B</sup>    | 0.7±0.4 <sup>AB</sup> | 1.0±0.3 <sup>AB</sup>  | 1.1±0.4 <sup>AB</sup>  | 0.8±0.2 <sup>AB</sup> | 0.8±0.2 <sup>AB</sup> | 1.0±0.1 <sup>B</sup>  |
| IRBB50      | 14.1±6.0 <sup>A</sup>                   | 10.6±3.3 <sup>A</sup>  | 11.8±2.2 <sup>A</sup>   | 2.1±0.4 <sup>B</sup>  | 1.2±0.1 <sup>B</sup>   | 0.7±0.3 <sup>B</sup>   | 1.2±0.2 <sup>B</sup>  | 1.0±0.5 <sup>B</sup>  | 1.2±0.7 <sup>B</sup>  |
| IRBB51      | 2.3±0.8 <sup>AB</sup>                   | 2.3±0.7 <sup>AB</sup>  | 2.0±0.5 <sup>ABC</sup>  | 3.1±0.6 <sup>A</sup>  | 1.3±0.3 <sup>BCD</sup> | 1.2±0.5 <sup>BCD</sup> | 0.6±0.3 <sup>D</sup>  | 0.5±0.4 <sup>D</sup>  | 0.9±0.6 <sup>CD</sup> |
| IRBB52      | 1.1±0.7 <sup>A</sup>                    | 1.0±0.4 <sup>AB</sup>  | 0.9±0.5 <sup>AB</sup>   | 1.2±0.7 <sup>A</sup>  | 0.3±0.2 <sup>BC</sup>  | 0.3±0.1 <sup>BC</sup>  | 0.3±0.2 <sup>BC</sup> | 0.3±0.2 <sup>BC</sup> | 0.2±0.1 <sup>C</sup>  |
| IRBB53      | 0.7±0.3 <sup>AB</sup>                   | 0.5±0.1 <sup>AB</sup>  | 0.7±0.3 <sup>AB</sup>   | 0.5±0.2 <sup>AB</sup> | 0.4±0.2 <sup>AB</sup>  | 0.5±0.2 <sup>AB</sup>  | 0.5±0.4 <sup>AB</sup> | 0.3±0.1 <sup>B</sup>  | 0.9±0.5 <sup>A</sup>  |
| IRBB54      | 1.8±0.5 <sup>ABC</sup>                  | 2.0±1.0 <sup>ABC</sup> | 1.6±0.3 <sup>ABCD</sup> | 2.2±0.2 <sup>AB</sup> | 0.6±0.4 <sup>BCD</sup> | 2.0±1.8 <sup>ABC</sup> | 2.8±1.2 <sup>A</sup>  | 0.3±0.1 <sup>D</sup>  | 0.4±0.2 <sup>CD</sup> |
| IRBB55      | 4.14±1.0 <sup>A</sup>                   | 4.8±1.80 <sup>A</sup>  | 1.95±0.7 <sup>B</sup>   | 1.0±0.4 <sup>BC</sup> | 0.7±0.5 <sup>BC</sup>  | 0.8±0.4 <sup>BC</sup>  | 0.4±0.2 <sup>C</sup>  | 0.3±0.1 <sup>C</sup>  | 0.4±0.2 <sup>C</sup>  |
| IRBB203     | 26.2±7.4 <sup>A</sup>                   | 23.9±0.4 <sup>AB</sup> | 16.0±4.7 <sup>B</sup>   | 3.0±0.5 <sup>C</sup>  | 0.3±0.2 <sup>C</sup>   | 1.1±0.4 <sup>C</sup>   | 1.0±0.2 <sup>C</sup>  | 0.7±0.3 <sup>C</sup>  | 0.9±0.1 <sup>C</sup>  |
| IRBB204     | 16.8±4.4 <sup>B</sup>                   | 20.3±3.5 <sup>AB</sup> | 23.0±3.8 <sup>A</sup>   | 2.8±0.3 <sup>C</sup>  | 1.0±0.3 <sup>C</sup>   | 1.0±0.6 <sup>C</sup>   | 0.9±0.5 <sup>C</sup>  | 1.1±0.4 <sup>C</sup>  | 0.9±0.5 <sup>C</sup>  |
| IRBB210     | 23.5±4.5 <sup>A</sup>                   | 26.4±2.6 <sup>A</sup>  | 26.7±3.7 <sup>A</sup>   | 3.5±1.1 <sup>B</sup>  | 1.9±0.9 <sup>B</sup>   | 0.9±0.4 <sup>B</sup>   | 0.5±0.1 <sup>B</sup>  | 0.8±0.2 <sup>B</sup>  | 1.2±0.8 <sup>B</sup>  |
| IRBB211     | 19.7±2.9 <sup>B</sup>                   | 25.0±2.2 <sup>A</sup>  | 23.3±4.0 <sup>A</sup>   | 4.3±0.9 <sup>C</sup>  | 1.3±0.6 <sup>C</sup>   | 2.0±0.3 <sup>C</sup>   | 2.2±0.3 <sup>C</sup>  | 1.4±0.3 <sup>C</sup>  | 2.1±0.3 <sup>C</sup>  |
| IR24        | 17.4±5.6 <sup>A</sup>                   | 15.5±4.8 <sup>A</sup>  | 20.0±3.5 <sup>A</sup>   | 1.6±0.95 <sup>B</sup> | 0.3±0.1 <sup>B</sup>   | 0.4±0.2 <sup>B</sup>   | 0.6±0.7 <sup>B</sup>  | 0.4±0.3 <sup>B</sup>  | 0.6±0.6 <sup>B</sup>  |
| IR26        | 15.2±1.6 <sup>A</sup>                   | 14.6±4.3 <sup>A</sup>  | 16.5±3.8 <sup>A</sup>   | 2.3±0.8 <sup>B</sup>  | 0.8±0.5 <sup>B</sup>   | 0.9±0.4 <sup>B</sup>   | 0.7±0.5 <sup>B</sup>  | 1.1±0.4 <sup>B</sup>  | 1.18±0.5 <sup>B</sup> |
| 78-1-5      | 0.3±0.2 <sup>A</sup>                    | 0.3±0.2 <sup>A</sup>   | 0.7±0.3 <sup>A</sup>    | 0.5±0.2 <sup>A</sup>  | 0.5±0.4 <sup>A</sup>   | 0.5±0.4 <sup>A</sup>   | 0.4±0.4 <sup>A</sup>  | 0.3±0.2 <sup>A</sup>  | 0.4±0.2 <sup>A</sup>  |
| BJ1         | 1.7±0.7 <sup>A</sup>                    | 2.5±0.9 <sup>A</sup>   | 1.1±0.5 <sup>ABC</sup>  | 0.7±0.2 <sup>BC</sup> | 1.0±0.5 <sup>BC</sup>  | 0.5±0.3 <sup>BC</sup>  | 0.8±0.4 <sup>BC</sup> | 0.5±0.4 <sup>C</sup>  | 0.6±0.4 <sup>BC</sup> |
| Asominori   | 21.5±6.8 <sup>A</sup>                   | 19.7±6.7 <sup>A</sup>  | 17.3±6.1 <sup>A</sup>   | 2.8±1.1 <sup>B</sup>  | 2.8±0.9 <sup>B</sup>   | 3.0±1.0 <sup>B</sup>   | 2.1±0.9 <sup>B</sup>  | 2.7±1.1 <sup>B</sup>  | 2.3±0.9 <sup>B</sup>  |
| DV85        | 1.0±0.7 <sup>A</sup>                    | 0.9±0.7 <sup>A</sup>   | 0.2±0.2 <sup>B</sup>    | 0.2±0.2 <sup>B</sup>  | 0.2±0.2 <sup>AB</sup>  | 0.4±0.3 <sup>AB</sup>  | 0.2±0.1 <sup>B</sup>  | 0.6±0.6 <sup>AB</sup> | 0.2±0.2 <sup>B</sup>  |
| Cas209      | 24.7±6.0 <sup>A</sup>                   | 24.5±2.6 <sup>A</sup>  | 24.2±4.7 <sup>A</sup>   | 2.0±0.8 <sup>B</sup>  | 0.8±0.5 <sup>B</sup>   | 3.2±0.9 <sup>B</sup>   | 0.4±0.4 <sup>B</sup>  | 1.1±0.9 <sup>B</sup>  | 1.0±0.7 <sup>B</sup>  |
| JG30        | 19.0±3.9 <sup>A</sup>                   | 23.9±6.2 <sup>A</sup>  | 10.5±5.2 <sup>B</sup>   | 3.8±2.5 <sup>C</sup>  | 1.7±0.4 <sup>C</sup>   | 1.2±0.7 <sup>C</sup>   | 2.0±1.3 <sup>C</sup>  | 2.2±0.8 <sup>C</sup>  | 2.9±1.2 <sup>C</sup>  |
| CBB23       | 0.4±0.2 <sup>A</sup>                    | 0.5±0.2 <sup>A</sup>   | 0.4±0.1 <sup>A</sup>    | 0.3±0.3 <sup>A</sup>  | 0.4±0.2 <sup>A</sup>   | 0.4±0.1 <sup>A</sup>   | 0.3±0.1 <sup>A</sup>  | 0.5±0.2 <sup>A</sup>  | 0.3±0.1 <sup>A</sup>  |
| DZ192       | 19.1±1.6 <sup>A</sup>                   | 19.4±2.0 <sup>A</sup>  | 21.0±1.0 <sup>A</sup>   | 3.2±0.8 <sup>B</sup>  | 2.4±0.3 <sup>B</sup>   | 4.1±1.4 <sup>B</sup>   | 3.8±1.2 <sup>B</sup>  | 4.4±0.9 <sup>B</sup>  | 3.8±1.4 <sup>B</sup>  |
| Kogyoku     | 16.6±2.2 <sup>A</sup>                   | 14.7±2.7 <sup>A</sup>  | 2.7±0.4 <sup>B</sup>    | 3.3±1.5 <sup>B</sup>  | 3.8±0.6 <sup>B</sup>   | 1.5±0.2 <sup>B</sup>   | 1.0±0.2 <sup>B</sup>  | 1.3±0.3 <sup>B</sup>  | 2.0±0.5 <sup>B</sup>  |
| X42         | 17.7±0.6 <sup>A</sup>                   | 17.2±1.8 <sup>A</sup>  | 18.2±0.5 <sup>A</sup>   | 5.3±0.2 <sup>B</sup>  | 2.3±1.3 <sup>C</sup>   | 1.8±0.3 <sup>C</sup>   | 1.5±0.4 <sup>C</sup>  | 1.4±0.4 <sup>C</sup>  | 2.3±0.2 <sup>C</sup>  |
| Nipponbare  | 10.6±1.8 <sup>A</sup>                   | 10.8±1.2 <sup>A</sup>  | 10.1±2.1 <sup>A</sup>   | 3.3±1.19 <sup>B</sup> | 2.9±0.4 <sup>B</sup>   | 2.4±0.1 <sup>B</sup>   | 2.1±0.2 <sup>B</sup>  | 2.3±0.3 <sup>B</sup>  | 2.2±0.1 <sup>B</sup>  |
| Minghui63   | 17.8±2.0 <sup>A</sup>                   | 11.3±2.4 <sup>A</sup>  | 15.8±2.1 <sup>A</sup>   | 2.7±0.3 <sup>B</sup>  | 2.3±0.4 <sup>B</sup>   | 0.8±0.1 <sup>B</sup>   | 0.6±0.2 <sup>B</sup>  | 0.6±0.2 <sup>B</sup>  | 1.7±0.2 <sup>B</sup>  |
| WaseAikoku3 | 13.1±1.0 <sup>A</sup>                   | 13.9±0.9 <sup>A</sup>  | 13.4±1.4 <sup>A</sup>   | 1.5±0.4 <sup>B</sup>  | 1.4±0.3 <sup>B</sup>   | 1.4±0.3 <sup>B</sup>   | 1.3±0.1 <sup>B</sup>  | 1.3±0.1 <sup>B</sup>  | 1.5±0.3 <sup>B</sup>  |

Note: Different upper letters in each row indicate significant difference in lesion lengths. Shaded is the rice variety that showed resistance to PXO99<sup>A</sup> mutant (PB) with the deletion of the TALE gene cluster 3.

**Supplementary Table 2. *Xal*-mediated resistance spectrum to *X. o. pv. oryzae* field isolates**

| Country of origin | Strain             | Disease reactions <sup>a</sup> | iTALE type A <sup>b</sup> | iTALE type B <sup>b</sup> |
|-------------------|--------------------|--------------------------------|---------------------------|---------------------------|
| The Philippines   | PXO61              | S                              | +                         | +                         |
|                   | PXO71              | S                              | +                         | +                         |
|                   | PXO79              | S                              | +                         | +                         |
|                   | PXO86              | S                              | +                         | +                         |
|                   | PXO99 <sup>A</sup> | S                              | +                         | +                         |
|                   | PXO112             | S                              | -                         | +                         |
|                   | PXO125             | S                              | +                         | +                         |
| Republic of Korea | KXO85              | R                              | -                         | -                         |
|                   | JW89011            | R                              | -                         | +                         |
|                   | K202               | S                              | +                         | +                         |
| Japan             | T7174              | R                              | -                         | +                         |
|                   | H75373             | S                              | +                         | +                         |
| Thailand          | Xoo2               | S                              | +                         | -                         |
| India             | A3842              | S                              | +                         | +                         |
|                   | A3857              | S                              | +                         | +                         |
|                   | PbXo7              | S                              | +                         | -                         |
| Indonesia         | IXO56              | S                              | +                         | +                         |
| Nepal             | NXO 260            | S                              | +                         | +                         |
| Colombia          | CIAT1185           | S                              | +                         | +                         |
| China             | ZHE 173            | S                              | +                         | -                         |
|                   | C1                 | S                              | -                         | +                         |
|                   | C3                 | S                              | +                         | +                         |
|                   | C4                 | S                              | +                         | +                         |
|                   | C5                 | S                              | +                         | +                         |
|                   | C6                 | S                              | -                         | +                         |
|                   | C7                 | S                              | +                         | +                         |
|                   | GD1358             | S                              | +                         | +                         |
|                   | HB17               | S                              | +                         | +                         |
|                   | HB21               | S                              | -                         | +                         |
|                   | HLJ72              | S                              | -                         | +                         |
|                   | JS49-6             | R                              | -                         | -                         |
|                   | LN57               | S                              | -                         | +                         |
|                   | NX42               | S                              | +                         | +                         |
| Australia         | Aust-2013          | R                              | -                         | +                         |
|                   | Aust-R3            | R                              | -                         | +                         |
| Cameroon          | AXO1947            | R                              | -                         | -                         |

<sup>a</sup> Disease reaction is characterized as “S” for susceptibility to bacterial infection when lesion lengths > 5 cm and resistance as “R” when lesion lengths <5 cm in *Xal* transgenic Kitaake 12 days after inoculation.

<sup>b</sup> “+” and “-” denotes the presence and absence of PCR product with type-specific primers for the two types (A and B) of iTALE genes on genomic DNA from individual strains.

**Supplementary Table 3. Bacterial strains used in this study**

| Strains or Plasmids                            | Relevant characteristics                                                                                           | Reference/<br>Source |
|------------------------------------------------|--------------------------------------------------------------------------------------------------------------------|----------------------|
| <b>Strains</b>                                 |                                                                                                                    |                      |
| <i>Xanthomonas oryzae</i> pv. <i>oryzae</i>    |                                                                                                                    |                      |
| PXO99 <sup>A</sup>                             | Philippine race 6                                                                                                  | (4)                  |
| PA                                             | Tal7 and Tal8 cluster knock-out mutant of PXO99 <sup>A</sup>                                                       | This study           |
| PB                                             | Tal3 cluster knock-out mutant of PA                                                                                | This study           |
| PC                                             | Tal2 cluster knock-out mutant of PB                                                                                | This study           |
| PD                                             | Tal9 cluster knock-out mutant of PC                                                                                | This study           |
| PE                                             | Tal5 cluster knock-out mutant of PD                                                                                | This study           |
| PF                                             | Tal1 cluster knock-out mutant of PE                                                                                | This study           |
| PG                                             | Tal6 cluster knock-out mutant of PF                                                                                | This study           |
| PH                                             | Tal4 cluster knock-out mutant of PG                                                                                | This study           |
| ΔTal3                                          | Tal3 cluster knock-out mutant of PXO99 <sup>A</sup>                                                                | This study           |
| <i>Xanthomonas oryzae</i> pv. <i>oryzicola</i> |                                                                                                                    |                      |
| RS105                                          | Chinese strain                                                                                                     | (5)                  |
| ΔTal5e                                         | Tal5e knock-out mutant of RS105                                                                                    | This study           |
| <b>Plasmids</b>                                |                                                                                                                    |                      |
| pHZWpthXo1                                     | pHM1 expressing <i>pthXo1</i> under <i>lacZ</i> promoter in pZW                                                    | (6)                  |
| pHZWtal3aC                                     | pHM1 expressing 6126bp ClaI fragment isolated from PXO99 <sup>A</sup> containing <i>tal3a</i> in pBluescript KS(-) | This study           |
| pHZWtal3bC                                     | pHM1 expressing 4547bp ClaI fragment isolated from PXO99 <sup>A</sup> containing <i>tal3b</i> in pBluescript KS(-) | This study           |
| pHZWtal3aF                                     | pHM1 expressing <i>tal3a</i> under <i>lacZ</i> promoter with FLAG in pZW                                           | This study           |
| pHZWtal3bF                                     | pHM1 expressing <i>tal3a</i> under <i>lacZ</i> promoter with FLAG tag in pZW                                       | This study           |
| pHZWΔ1-15                                      | <i>tal3a</i> repeat-deletion derivative in pHZW                                                                    | This study           |
| pHZWΔ1-10                                      | <i>tal3a</i> repeat-deletion derivative in pHZW                                                                    | This study           |
| pHZWΔ1-2                                       | <i>tal3a</i> repeat-deletion derivative in pHZW                                                                    | This study           |
| pHZWtal3aFL                                    | Full-length <i>tal3a</i> in pHZW                                                                                   | This study           |
| pHZWtal3aM                                     | <i>tal3a</i> with its NLS mutated in pHZW                                                                          | This study           |
| pHZWtal3aSV                                    | <i>tal3a</i> with its NLS mutated and additional SV40 NLS                                                          | This study           |
| pHZWtal3bFL                                    | Full-length <i>tal3b</i> in pHZW                                                                                   | This study           |
| pHZWtal3bM                                     | <i>tal3b</i> with its NLS mutated in pHZW                                                                          | This study           |
| pHZWtal3bSV                                    | <i>tal3b</i> with its NLS mutated and additional SV40 NLS                                                          | This study           |
| pHMZWpthXo1M                                   | PthXo1 with NLS mutated                                                                                            | This study           |
| pHMZWpthXo1SV                                  | PthXo1 with NLS mutated and additional SV40 NLS                                                                    | This study           |
| pHMZWavrXa7                                    | AvrXa7 from pZWavrXa7 in pHM1                                                                                      | (1)                  |
| pHMZWavrXa7M                                   | AvrXa7 with NLS mutated                                                                                            | (1)                  |
| pHMZWavrXa7SV                                  | AvrXa7 with NLS mutated and additional SV40 NLS                                                                    | (1)                  |
| pHZWXo1N-Tal3aRC                               | <i>tal3a</i> variant containing PthXo1 N-terminus in pHZW                                                          | This study           |



|                  |                                                             |            |
|------------------|-------------------------------------------------------------|------------|
| pHZWTal3aNR-Xo1C | <i>tal3a</i> variant containing PthXo1 C-terminus in pHZW   | This study |
| pHZWtal4         | pHM1 expressing <i>tal4</i> from PXO99 <sup>A</sup> in pZW  | This study |
| pHZWtal9d        | pHM1 expressing <i>tal9d</i> from PXO99 <sup>A</sup> in pZW | This study |
| pHZWtal3_PXO86   | pHM1 expressing <i>tal3</i> from PXO86 in pZW               | This study |
| pHZWtal6_PXO86   | pHM1 expressing <i>tal6</i> from PXO86 in pZW               | This study |
| pHZWtal5e_RS105  | pHM1 expressing <i>tal5e</i> from RS105 in pZW              | This study |
| pHM1tal12_BXOR1  | pHM1 expressing <i>tal12</i> from BXOR1                     | This study |
| pHM1tal11h_BXOR1 | pHM1 expressing <i>tal11h</i> from BXOR1                    | This study |

**Supplementary Table 4. Primers and sequence information.**

| Primer name | Primer Sequence (5' to 3')          |
|-------------|-------------------------------------|
| Tal1F1      | ATATATCTAGACGGCAGTGATGGCGAACGGTT    |
| Tal1R1      | ATATAGAGCTCTCGTTGGCCAGGCGCAGCTCG    |
| Tal1F2      | ATATAGAGCTCGCCGGCGACATCGCCACCGC     |
| Tal1R2      | TATATGTCGACAAAGGTCCGTGCGGCATCTGG    |
| Tal2F1      | TATATCCCGGGATGCTGGCGGCCAGTA         |
| Tal2R1      | TATATAAGCTTCATGCATTGCGCGATT         |
| Tal2F2      | TATATAAGCTTCACTGCCTCCACTGCG         |
| Tal2R2      | TATATGTCGACCCACATCTGCGGCGCA         |
| Tal3F1      | ATACCCGGGCATGGCGGAATCCGGTGCG        |
| Tal3R1      | AATACTAGTAATCTTGAGAAGTTGGCCTG       |
| Tal3F2      | ATAACTAGTTCGCATGATTGATGGAGCTA       |
| Tal3R2      | TTAGCATGCTCGTACGCATGAAGGCTGGA       |
| Tal4F1      | ATATACCCGGGATGCATTTTTTGGCGAAGGGCACT |
| Tal4R1      | ATATATCTAGAACATCCGCTGGTTGCTGCGGGCCA |
| Tal4F2      | ATATATCTAGAGTGGACCTGCTCAAGCGAATGATG |
| Tal4R2      | TATATGTCGACTTCTGGCGCAACTTCGGCCAGGCA |
| Tal5F1      | ATATACCCGGGAGCAATGGCCGCATGAGCCAGG   |
| Tal5R1      | TATATGCATGCGCCGCCGCAAGCGCCGTCGGCG   |
| Tal5F2      | TGCGCCATGCATGCACTGCCTCCACTGCGGTCA   |
| Tal5R2      | TATATGTCGACCACAATCAATGGCCTGCTGGGC   |
| Tal6F1      | ATATACCCGGGATGGCAATGAGATATGGTTGAACC |
| Tal6R1      | TATATGGATCCTCACCGCTGAAAGTGCGTGCTAAT |
| Tal6F2      | ATATAGGATCCGATCCTGGTACGCCCATCGCTGCC |

|              |                                                                               |
|--------------|-------------------------------------------------------------------------------|
| Tal6R2       | TATATGTCGACCGCAGCAAGCAGCGCTTGTGGACC                                           |
| Tal7/8F1     | GGACCCGGGGTAGGGACCACAGACCGCTAG                                                |
| Tal7/8R1     | CCAAAGCTTACTGTGCGAACGCACCTTCGGT                                               |
| Tal7/8F2     | TGGAAGCTTGACCTTGATGCGCCTAGCC                                                  |
| Tal7/8R2     | TCCTCTAGACTGAGGCAATAGCTCCATC                                                  |
| Tal9F1       | ATATACCCGGGATGCTCAAGAACGATCGCCTGCTG                                           |
| Tal9R1       | TATATGCATGCACCCGAATCCTGGGTGACACGGGC                                           |
| Tal9F2       | ATATAGCATGCATTTTTACCACCTTCTGAGAAGCG                                           |
| Tal9R2       | TATATGTCGACCTTGCCGAGAGTTCAAGACCTGG                                            |
| Tal3aHFF     | CGTTGGCCGCGTTGACCAACGACCACCTCGT                                               |
| Tal3aHFR     | TATAAGCTTCACTTATCGTCATCGTCCTTGTAAATCGGACCGTTTACGTCTGCTTG                      |
| Tal3bHFF     | CGTTGGCCGCGTTGACCAACGACCAACTCGT                                               |
| Tal3bHFR     | TATAAGCTTCACTTATCGTCATCGTCCTTGTAAATCATCATGCGATTTCTCTTTCCTTGAAT                |
| TAL3aMF1     | CAGGCATCAGGGACGGCAGCTGCCGCGGCATCCCCTACTTCAGCTCAGAC                            |
| TAL3aMF2     | CACCGAATTCGAAGCCCGCTGCGGAACATCCCCCAGCCTCGCAGCGTTGGGACCGTATCCTCCAGGCATCAGGGACG |
| TAL3aMR      | ATAAGCTTCACTTATCGTCATCGTCCTTGTAAATCTGCCGCGGCAGCTGCGCTTGCCCGCGTCTGATCTC        |
| Tal3aSVR     | TATAAGCTTCTAGATCAGACCTTGCGCTTCTTCTTTGGTCGCTTATCGTCATCGTCCTT                   |
| Tal3HincIIIF | GTTGGCCGCGTTGACCAACGACCA                                                      |
| Tal3bMR      | ATAAGCTTCACTTATCGTCATCGTCCTTGTAAATCATCATGCGACGCGGCAGCTGCTGAATGCCGG            |
| Tal3bSVR     | AAGCTTCAAGACCTTGCGCTTCTTCTTTGGTCGCGATGAGGATCCCTTATCGTCATCGTC                  |
| GFPKpF       | CACCGGTACCGTCGCCACCATGGTGAGCAAGGG                                             |
| GFPBamR      | CCGGATCCTCCGGACTTGTACAGCTCGTC                                                 |
| Tal5RSF1     | CGACCCGGGGCACCCTGTGCACG                                                       |
| Tal5RSR1     | ATGGATCCTGGCGCATGCCATCGCCGCTATGG                                              |
| Tal5RSF2     | TGGGATCCATCAGGCATACCTCTTTGGAGAA                                               |
| Tal5RSR2     | ATGTCGACTCATGCTGCACACCAAGCCGTGG                                               |
| BXOR1F       | CGGAGGGGTTGGATCCTACGACACGCATCGGTAGATCTG                                       |
| BXOR1R       | CGAGGGCCCCGGGATCCGTCGCTCAGATAGTCCCCCGA                                        |
| Tal3aF1      | CAGACGTAAACGGTCCT                                                             |
| Tal3aR1      | ACGCTGCCAGGTCGGCAACC                                                          |
| Tal3aF2      | ATCAGGCGTCTTTGCATGC                                                           |
| Tal3aR2      | TGACAGCACGATCCGATCA                                                           |
| Tal3bF1      | GACGTCTGCCCGCATT                                                              |
| Tal3bR1      | GGACGTCGCTCAGATAGTC                                                           |
| 16SrRNA-F    | TGGTAGTCCACGCCCTAAACG                                                         |
| 16SrRNA-R    | CTGGAAAAGTTCCGTGGATGTC                                                        |
| Xa1F1        | TGATTACGAATTCGAGCTAACAACTTTTCTTTTCTGAATC                                      |
| Xa1R1        | TCATTACCAAAAAGCATGCACTTTAAATAGTGA                                             |
| Xa1F2        | TGGTCACTATTTAAAGTGCATGCTTTTGGTAA                                              |

|         |                                            |
|---------|--------------------------------------------|
| Xa1R2   | TAGAGGATCCCCGGGTACCGTGACAATGCATTGGAGCGGATT |
| Xa1F3   | AACTGATTACTCGGTGGCTTG                      |
| U       | TGTA AACGACGGCCAGT                         |
| PR1F    | CGTCTTCATCACCTGCAA                         |
| PR1R    | TCAGCGTACGATAGTAGTA                        |
| PBZ-F   | CTCAAGATGATCGAGGAC                         |
| PBZ-R   | CGTCTTCATCACCTGCAA                         |
| POX-F   | ACGACATAAACGGGCCAC                         |
| POX-R   | AGGTGCTAATGCCATGGCT                        |
| Actin-F | CTCAGCACATTCCAGCAGAT                       |
| Actin-R | ACAGATAGGCCGGTTGAAAA                       |

## References cited

1. B. Yang, W. Zhou, L. B. Johnson & F. F. White, The virulence factor AvrXa7 of *Xanthomonas oryzae* pv. *oryzae* is a type III secretion pathway-dependent nuclear-localized double-stranded DNA-binding protein. *Proc. Natl. Acad. Sci. U. S. A.* **97**, 9807-9812 (2000).
2. Livak, K. J. & Schmittgen, T. D. Analysis of relative gene expression data using real-time quantitative PCR and the 2<sup>(-Delta Delta C(T))</sup> Method. *Methods* **25**, 402-408 (2001).
3. Wang, X. *et al.* Histone lysine methyltransferase SDG8 is involved in brassinosteroid-regulated gene expression in *Arabidopsis thaliana*. *Mol. Plant.* **7**, 1303-1315 (2014).
4. C. M. Hopkins, F. F. White, S. H. Choi, A. Guo & J. E. Leach, Identification of a family of avirulence genes from *Xanthomonas oryzae* pv. *oryzae*. *Mol. Plant Microbe Interact.* **5**, 451-459 (1992).
5. Z. Song *et al.*, Identification and Characterization of Two Novel DSF-Controlled Virulence-Associated Genes Within the nodB-rhgB Locus of *Xanthomonas oryzae* pv. *oryzicola* Rs105. *Phytopathology.* **105**, 588-596 (2015).
6. B. Yang & F. F. White, Diverse members of the AvrBs3/PthA family of type III effectors are major virulence determinants in bacterial blight disease of rice. *Mol. Plant Microbe Interact.* **17**, 1192-1200 (2004).
